# Supplementary material for: Molecular portraits and the family tree of cancer
Source: Springer Nature journal article supplement (doi:10.1038/ng1038), 2002-11-26
Supplement: ng1038-S1.pdf [file ng1038-S1.pdf]

There are three TreeView files associated with Web Figure A:

|                        |         |
|------------------------|---------|
| <b>MoPo_family.cdt</b> | ( 7KB)  |
| <b>MoPo_family.atr</b> | (980KB) |
| <b>MoPo_family.gtr</b> | ( 36KB) |

The files have been compressed, and are available to both PC and Mac users.

#### PC Users

Please click [here](#) to access the compressed files. A WinZip file, *treeview.zip* (381KB) will automatically download to your computer. If you don't have the WinZip software, you can download an evaluation copy [here](#).

#### Mac Users

Please click [here](#) to access the compressed files. A StuffIt file, *treeview.sit* (282KB) will automatically download to your computer. If you don't have the StuffIt software, you can download a free copy of the StuffIt Expander software [here](#).
